# Supplementary material
Source: Springer Nature journal article supplement (https://www.springermedizin.de/resource/supplementary/12936_2007_468_MOESM4_ESM.pdf/9547516)

Anti-*P. falciparum* lysate  
IgG [RU]

**A**

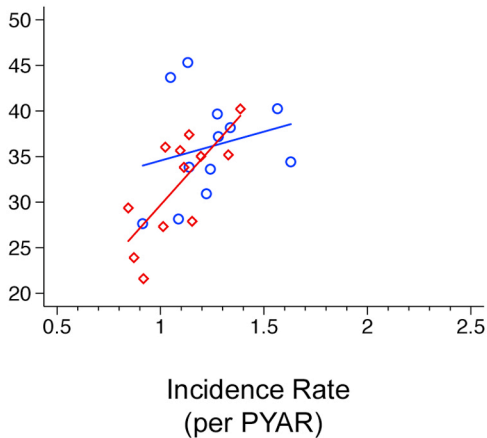

**B**

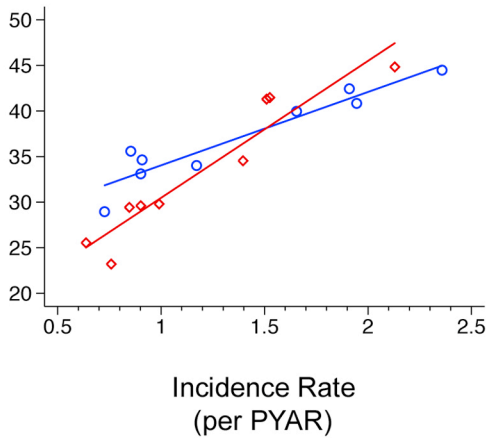

Supplement: MOESM4 [file 9547516]
